# Supplementary material
Source: Springer Nature journal article supplement (https://www.springermedizin.de/resource/supplementary/13756_2012_41_MOESM2_ESM.pdf/9682270)

*P. aeruginosa*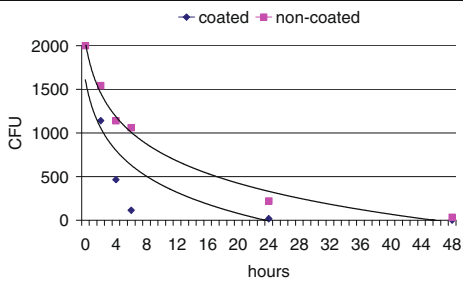*A. baumannii*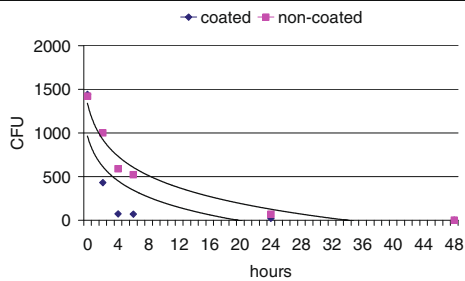*E. coli*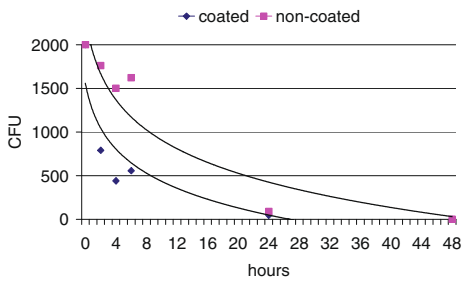*K. pneumoniae*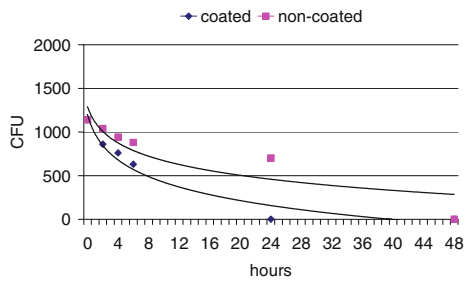*PVL-producing S. aureus*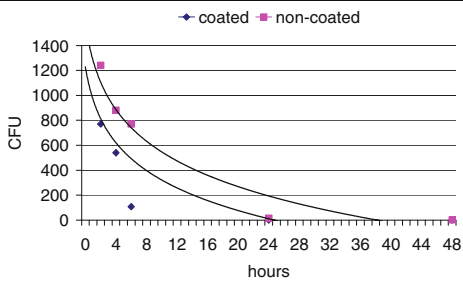*S. aureus Mu50*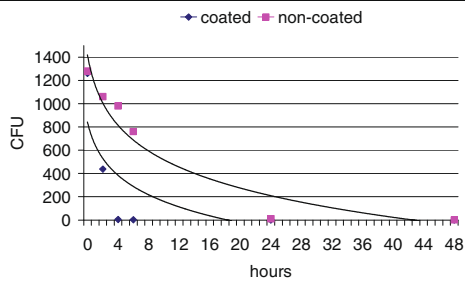*E. faecium*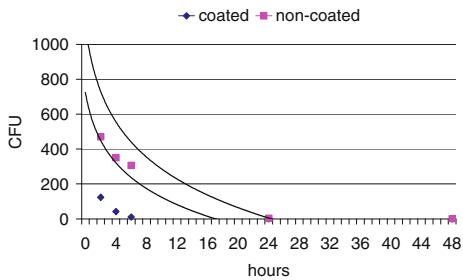*C. albicans*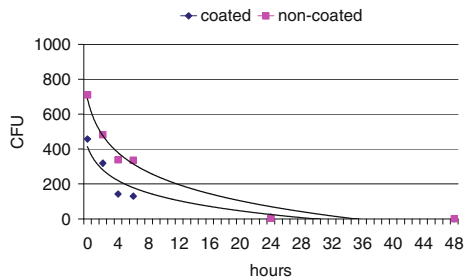*C. difficile*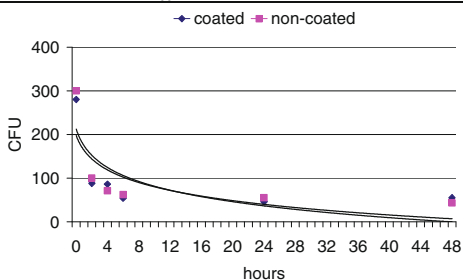*A. fumigatus*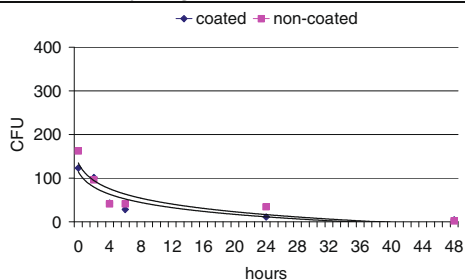

Supplement: MOESM2 [file 9682270]
